# Supplementary material for: Genetic evaluation of BRCA1-A complex genes with triple-negative breast cancer susceptibility in Chinese women
Source: PubMed Central journal article supplement (PMC4891082; doi:10.18632/oncotarget.7112), 2016-02-01
Supplement: oncotarget-07-09759-s001.pdf [file oncotarget-07-09759-s001.pdf]

# Genetic evaluation of BRCA1-A complex genes with triple-negative breast cancer susceptibility in Chinese women

## Supplementary Materials

### MATERIALS AND METHODS

#### Study participants

The triple-negative breast cancer diagnoses of patients are determined by the pathologists of the department of Pathology in the Fudan University Shanghai Cancer Center. The H.E staining of tumor tissue slides was performed and used for determining invasive breast carcinoma. A triple-negative breast cancer case was defined as a patient tumor sample negative in Estrogen Receptor (ER), Progesterone Receptor (PR) and HER2 expression in immunohistochemistry (IHC) staining. Patients with HER2 expression status (IHC, score equals to 2+) were subjected to fluorescence *in situ* hybridization (FISH) test for the HER2 gene amplification. The HER2 over-expression subgroup was defined as FISH positive or IHC staining score equals to 3+. All criteria in this study followed standard procedure which has been described previously. Table S2 presents the baseline characteristics of all the participants in this study. Patients and controls were compared in age, menopause and body mass index.

The triple-negative breast cancer cases were more likely to be at younger age at menarche than controls.

#### *In silico* analysis of the investigated SNPs

The genetic variants in this study were analyzed using functional prediction software. Two different computational programs, SIFT (<http://sift.jcvi.org/>) and PolyPhen-2 (<http://genetics.bwh.harvard.edu/pph/>) were carried out for functional predictions of non-synonymous variants. For SNPs in promoter region, RegulomeDB (<http://regulome.stanford.edu/>), TFSEARCH (<http://www.cbrc.jp/research/db/TFSEARCH.html>) and SNPinfo (<http://snpinfo.niehs.nih.gov/>) were used to find the binding sites of the transcription factors. Three programs, ESE Finder 3.0 (<http://rulai.cshl.edu/cgi-bin/tools/ESE3/esefinder.cgi?process=home>), RESCUE-ESE (<http://genes.mit.edu/burgelab/rescue-ese/>) and PESX (<http://cubweb.biology.columbia.edu/pesx/>) were used to find the ESEs and ESSs in sequence and predict whether the allele change of synonymous SNPs might cause the ESEs or ESS change.

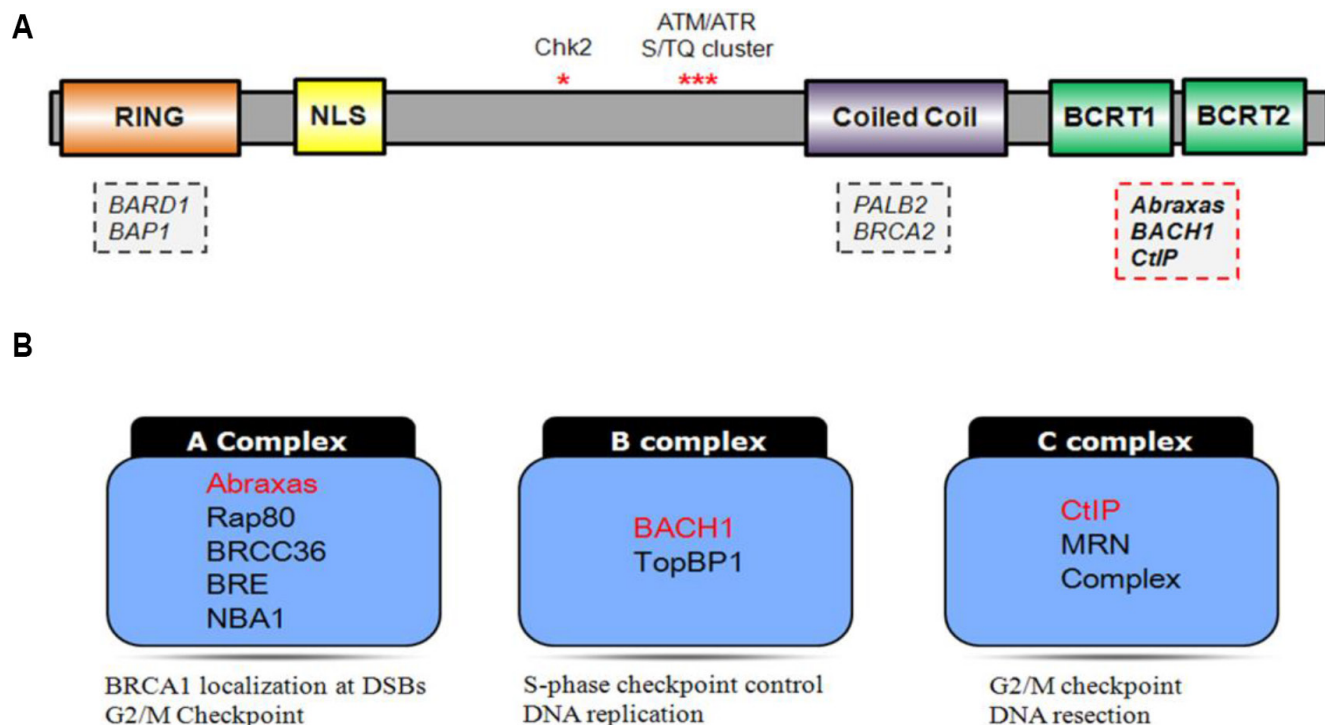

**Supplementary Figure: S1 A schematic view of BRCA1 and BRCA1 BRCT domains associated protein complexes.** (A) BRCA1 contains a RING domain at its N-terminus, a coiled-coil domain and two BRCT domains at the C-terminus. The tandem BRCT domains interact with phospho-SPxF motif-containing proteins ABRAXAS, Bach1 and CtIP. (B) A diagram of the BRCA1 BRCT domain associated complexes and their functions. ABRAXAS, BACH1 and CTIP serve as an adaptor protein that binds directly to BRCA1 in the BRCA1 A, B and C complexes. The BRCA1-A complex contains at least five components: ABRAXAS, RAP80, BRE, BRCC36 and NBA1; the BRCA1-B complex contains at least two components: BACH1 and TopBP1; the BRCA1-C complex contains at least CtIP and the MRN complex (Mre11, Rad50 and Nbs1).

**Supplementary Table S1: Primers for SNP genotyping**

| SNP_ID     | Primer1                        | Primer2                         |
|------------|--------------------------------|---------------------------------|
| rs6721349  | ACGTTGGATGAGACCTCTCCTACTCTGATG | ACGTTGGATGTCTGGAATTCCTTCTGTCCCC |
| rs7250266  | ACGTTGGATGCCTACCTCTTTTTTCATGGC | ACGTTGGATGTGACTAGCCATGATCGCGTG  |
| rs3745185  | ACGTTGGATGAGAGGGACCCATTTGGAGAG | ACGTTGGATGGTATAGGTCATACTGCAGGG  |
| rs13360277 | ACGTTGGATGCATCCAGTAACCAGGTATCC | ACGTTGGATGTTGCAGTACATGGCATGTCCG |
| rs10406920 | ACGTTGGATGCTGAACAGCCCTTCACTGAC | ACGTTGGATGAGCTGGTACCCTTGGTATCC  |
| rs8100241  | ACGTTGGATGGTCCTCTAGCACCAAATTAG | ACGTTGGATGACTCTGACCGCGGTGTTTG   |
| rs58720304 | ACGTTGGATGCTCTGAGACCTCTTAAGTTC | ACGTTGGATGCAGAGGGAAGACACTAGTTT  |
| rs12478271 | ACGTTGGATGGAGACTTCACTACATCTCTT | ACGTTGGATGGAGAACTGCACACTTGTTT   |
| rs10403581 | ACGTTGGATGTCTCAAATGGGTCCCTCTG  | ACGTTGGATGCATGGCTGAGCAAAGTTCCT  |
| rs10173507 | ACGTTGGATGGAGCACATGCCCAACCATTG | ACGTTGGATGTAGGAGACACAGTGAAGCCC  |
| rs6737313  | ACGTTGGATGGGCAACAACCTCTTTTCAG  | ACGTTGGATGTTTTCAATGGTTATCTAGG   |
| rs13125836 | ACGTTGGATGTGGGCTGCTCATTTTGGATG | ACGTTGGATGCAAGAGATCTCGGTTGTTAG  |
| rs17078630 | ACGTTGGATGTGCCAGACTTCTCTAGACA  | ACGTTGGATGCAGTCCAAACGATGGTATGT  |
| rs72931487 | ACGTTGGATGACATGCCAGCCTCAACAAG  | ACGTTGGATGGACTGTATGGCCCAAAAAC   |

|             |                                  |                                 |
|-------------|----------------------------------|---------------------------------|
| rs6710214   | ACGTTGGATGACAAGTTAAATGTGGATTG    | ACGTTGGATGCATTAATTTAGGGTGGGAC   |
| rs10209126  | ACGTTGGATGCCAGATCACCTAGTCCATAC   | ACGTTGGATGTAATGCCTATCATAGTGGCT  |
| rs2278256   | ACGTTGGATGAGGCAGCTCTCACTCCAAAC   | ACGTTGGATGGAGACAGAACTGGTTGAGG   |
| rs12642536  | ACGTTGGATGCCGAGATCTCTTGAATTGCC   | ACGTTGGATGAGCTAGTCCAGCTAGTACAC  |
| rs11891642  | ACGTTGGATGTGCAGCCTGGATTTACAATG   | ACGTTGGATGCAGGTACCAACAATTGAAG   |
| rs895745    | ACGTTGGATGTGTGTAGGGTATTAGGTAGG   | ACGTTGGATGCAGTGCTGAACAAAAGAGAC  |
| rs13167812  | ACGTTGGATGTAGACAAAAGGATGCCACGG   | ACGTTGGATGGAAGTGGTAGTTTCCACATC  |
| rs10189899  | ACGTTGGATGAACAGGTGAGCAAACCAGAG   | ACGTTGGATGCTAGATTTGAGTCTTGCCCC  |
| rs4898413   | ACGTTGGATGGGAAAACCTCTAGGCAGATAG  | ACGTTGGATGAGCCCAACATGAGTTCTAGC  |
| rs353465    | ACGTTGGATGTTATGCCATTTGCCTCCCTG   | ACGTTGGATGCACAGCATATGCTGAATGTC  |
| rs5945286   | ACGTTGGATGAGATGAAGATAAGCACCAGG   | ACGTTGGATGTTACCTTCCCCAGTCAAAC   |
| rs5945300   | ACGTTGGATGATGCATCGTTAGGCAACTTC   | ACGTTGGATGCATATAGCCTGGGCATGTAG  |
| rs17078658  | ACGTTGGATGCACAGCTCTATAACAATGCAG  | ACGTTGGATGTAAGACAAGTGACTACTCCC  |
| rs17352824  | ACGTTGGATGGTGCCTGGGAAAGGTAATGA   | ACGTTGGATGGCTGAAAAAATCACTTGTGT  |
| rs6547829   | ACGTTGGATGCAGAGAAGGCAACAGATAGG   | ACGTTGGATGACTATCTGACCCACCTGTTT  |
| rs8170      | ACGTTGGATGAGTTTCGCCATGCAGTTGTG   | ACGTTGGATGTGGATACCAAGGGTACCAG   |
| rs12464240  | ACGTTGGATGGGTACAACAGCCTTTATGCC   | ACGTTGGATGTGAGGCTTCTCAGAGAGAAC  |
| rs12422     | ACGTTGGATGGGGACCACTATGGCTTAATG   | ACGTTGGATGGAATTTCTAGGGTCCAAAAG  |
| rs3733876   | ACGTTGGATGGCTGCTTTGACCAGTAAGAG   | ACGTTGGATGGGGTACTTACCAGGACAAAC  |
| rs17709034  | ACGTTGGATGAAAAGCCACCTAAACACAAC   | ACGTTGGATGTTGTGGCCTTAGTTGTCACC  |
| rs2363956   | ACGTTGGATGAGCCATGCAGAGGTGACAAC   | ACGTTGGATGGTTTGTCCACAGTTTCAAGG  |
| rs144376330 | ACGTTGGATGTAGGGGCACAGGCCAGCGT    | ACGTTGGATGTCCTGAAGTGTGAGGCTCC   |
| rs3734091   | ACGTTGGATGAAGATATTCAACAGAGGAG    | ACGTTGGATGTGATGAGAGTACTGATGAGG  |
| rs11739147  | ACGTTGGATGTTCTTTTCTTGTGTGGG      | ACGTTGGATGGTTTTATAAGCTGCTCCTGTC |
| rs365132    | ACGTTGGATGCAAGGTCAAAAAGTTTCAGAGG | ACGTTGGATGCACAAAATGAAAATTAATGGG |
| rs77519137  | ACGTTGGATGAAATGTTAACACTCATCAC    | ACGTTGGATGATGAGCTATTTGGGGATCAG  |
| rs10420922  | ACGTTGGATGTGAGAGCCCCGTATCTTTTG   | ACGTTGGATGGAGGGACATTTTAGGGCTTG  |
| rs201627097 | ACGTTGGATGGCTTTAGATCGTTTGTCTTG   | ACGTTGGATGAGACTTAGATGACAGATGGC  |

**Supplementary Table S2: Clinical characteristic of subjects in step-one cohort (414 TNBCs and 354 controls)**

|                        | Patients    | Control     | <i>P</i> <sup>a</sup> value |
|------------------------|-------------|-------------|-----------------------------|
| Age (year)             |             |             | 0.37                        |
| ≤ 50                   | 256 (61.8%) | 230 (65.0%) |                             |
| > 50                   | 158 (38.2%) | 124 (35.0%) |                             |
| Age at Menarche (year) |             |             | < 0.01                      |
| ≤ 13                   | 176 (42.5%) | 113 (31.9%) |                             |
| > 13                   | 238 (57.5%) | 241 (68.1%) |                             |
| Menopause              |             |             | 0.84                        |
| no                     | 279 (67.4%) | 241 (68.1%) |                             |
| yes                    | 135 (32.6%) | 113 (31.9%) |                             |
| Number of Live Birth   |             |             | 0.65                        |
| 1                      | 364 (87.9%) | 315 (89.0%) |                             |
| > 1                    | 50 (12.1%)  | 39 (11.0%)  |                             |
| BMI                    |             |             | 0.62                        |
| ≤ 24                   | 237 (57.2%) | 209 (59.0%) |                             |
| > 24                   | 177 (42.8%) | 145 (41.0%) |                             |

NOTE: <sup>a</sup> Two-sided  $\chi^2$  test.  $P < 0.05$  was considered statistically significant; Abbreviations: BMI, body mass index.

**Supplementary Table S3: Clinical characteristic of subjects in step-two cohort (652 non-TNBCs and 890 controls)**

|                        | Patients    | Control     | <i>P</i> <sup>a</sup> value |
|------------------------|-------------|-------------|-----------------------------|
| Age (year)             |             |             | 0.49                        |
| ≤ 50                   | 361 (55.4%) | 477 (53.6%) |                             |
| > 50                   | 291 (44.6%) | 413 (46.4%) |                             |
| Age at Menarche (year) |             |             | < 0.01                      |
| ≤ 13                   | 261 (40.0%) | 182 (20.4%) |                             |
| > 13                   | 391 (60.0%) | 708 (79.6%) |                             |
| Menopause              |             |             | 0.36                        |
| no                     | 410 (62.9%) | 580 (65.2%) |                             |
| yes                    | 242 (37.1%) | 310 (34.8%) |                             |
| Number of Live Birth   |             |             | 0.09                        |
| 1                      | 568 (87.1%) | 801 (90.0%) |                             |
| > 1                    | 84 (12.9%)  | 89 (10.0%)  |                             |
| BMI                    |             |             | 0.08                        |
| ≤ 24                   | 372 (57.1%) | 497 (55.8%) |                             |
| > 24                   | 280 (42.9%) | 393 (44.2%) |                             |

NOTE: <sup>a</sup> Two-sided  $\chi^2$  test.  $P < 0.05$  was considered statistically significant; Abbreviations: BMI, body mass index.

**Supplementary Table S4: Associations between each SNPs genotypes and non-TNBCs risk (652 non-TNBCs and 890 controls)**

| SNP       | Genotype | Case        | Control     | Codominant       |      |                  | Dominant    |                  |      | Recessive   |      |  |
|-----------|----------|-------------|-------------|------------------|------|------------------|-------------|------------------|------|-------------|------|--|
|           |          |             |             | OR (95% CI)      | P    |                  | OR (95% CI) | P                |      | OR (95% CI) | P    |  |
|           |          |             |             |                  |      |                  |             |                  |      |             |      |  |
| rs2278256 | TT       | 288 (44.1%) | 401 (45.0%) | reference        | 0.91 | reference        | 0.91        | reference        | 0.74 | reference   | 0.69 |  |
|           | TC       | 288 (44.1%) | 392 (44.0%) | 0.98 (0.79–1.21) |      | 0.97 (0.79–1.19) |             | 0.94 (0.68–1.29) |      |             |      |  |
|           | CC       | 76 (11.7%)  | 99 (11.1%)  | 0.93 (0.66–1.30) |      |                  |             |                  |      |             |      |  |
| rs7250266 | CC       | 434 (66.5%) | 600 (67.4%) | reference        | 0.81 | reference        | 0.81        | reference        | 0.71 | reference   | 0.70 |  |
|           | GC       | 194 (29.8%) | 254 (28.5%) | 0.94 (0.75–1.18) |      | 0.96 (0.77–1.19) |             | 1.11 (0.66–1.88) |      |             |      |  |
|           | GG       | 24 (3.7%)   | 36 (4.1%)   | 1.09 (0.64–1.86) |      |                  |             |                  |      |             |      |  |

**Supplementary Table S5: Pathogenicity prediction of selected SNPs**

| SNP     | Position/<br>Function | nsSNP               |                   | TF Binding Site                                                    |          | miRNA (SNPinfo) |         |        | Exonic Splicing Enhancers/<br>Silencers |                |      |                |
|---------|-----------------------|---------------------|-------------------|--------------------------------------------------------------------|----------|-----------------|---------|--------|-----------------------------------------|----------------|------|----------------|
|         |                       | Poly<br>Phen -2     | SIFT              | RegulomeDB                                                         | TFSEARCH | SNPinfo         | miRanda | Sanger | ESE<br>Finder                           | RESCUE-<br>ESE | PESX |                |
| NBAI    | rs2278256             | 5' near gene        |                   |                                                                    | change   | yes             |         |        |                                         |                |      |                |
|         | rs7250266             | 5' near gene        |                   | Likely to affect binding and linked to expression of a gene target | change   | yes             |         |        |                                         |                |      |                |
|         | rs8170                | exon/<br>synonymous |                   |                                                                    |          |                 |         |        | change                                  | ND             | ND   | ND             |
|         | rs144376330           | exon/<br>synonymous |                   |                                                                    |          |                 |         |        | ND                                      | ND             | ND   | ESS<br>changed |
| Rap80   | rs365132              | exon/<br>synonymous |                   |                                                                    |          |                 |         |        | change                                  | ND             | ND   | ND             |
|         | rs3733876             | exon/<br>missense   | Possibly Damaging | Tolerated                                                          |          |                 |         |        |                                         |                |      |                |
|         | rs13360277            | exon/<br>missense   | Benign            | Tolerated                                                          |          |                 |         |        |                                         |                |      |                |
|         | rs13167812            | exon/<br>missense   | Possibly Damaging | Damaging                                                           |          |                 |         |        |                                         |                |      |                |
|         | rs12422               | 3'UTR               |                   |                                                                    |          |                 | ND      | ND     |                                         |                |      |                |
| BRE     | rs58720304            | 3'UTR               |                   |                                                                    |          |                 | change  | ND     |                                         |                |      |                |
| Abraxas | rs13125836            | exon/<br>missense   | Possibly Damaging | Tolerated                                                          |          |                 |         |        |                                         |                |      |                |
|         | rs12642536            | exon/<br>missense   | Benign            | Tolerated                                                          |          |                 |         |        |                                         |                |      |                |

ND: no data/ not analyzed

**Supplementary Table S6: Summary of literatures**

| Genes         | Reference          | Study group                          | Ethnicity            | SNPs (Allele) | Position        | Genotype              | Haplotype       |
|---------------|--------------------|--------------------------------------|----------------------|---------------|-----------------|-----------------------|-----------------|
| NBA1          | Zheng              | patients with breast cancer          | African-American     | NS            |                 | NS                    | ND              |
|               | Solyom             | breast/ovarian cancer familial woman | Caucasian            | NS            |                 | NS                    |                 |
|               | Rebeck             | BRCA1 mutation carrier               | Mixed (USA)          | rs3745185     | Intron          | HR = 0.82, 0.82       | HR = 1.15, 1.22 |
|               |                    |                                      | (Caucasian/Hispanic) | rs10406920    | Intron          | HR = 1.25, 1.37       |                 |
|               |                    |                                      |                      | rs8170        | Exon/synonymous | HR = 1.19, 1.24       |                 |
|               | Stevens            | patients with TNBC                   | Caucasian            | rs8170        | Exon/synonymous | OR = 1.27             | ND              |
|               | Antoniou           | BRCA1 mutation carrier               | Mixed                | rs8170        | Exon/synonymous | HR = 1.27, 1.58       | ND              |
|               |                    | and patients with TNBC               |                      | rs3745185     | Intron          | HR = 0.86, 0.73       |                 |
| Present study | Patients with TNBC | Chinese                              | rs7250266            | 5' near gene  | OR = 0.77,0.41  | OR = 0.73             |                 |
| Brcc36        | Rebeck             | BRCA1 mutation carrier               | Mixed (USA)          | NS            |                 | NS                    | NS              |
|               |                    |                                      | (Caucasian/Hispanic) |               |                 |                       |                 |
| Present study | Patients with TNBC | Chinese                              | NS                   |               | NS              | NS                    |                 |
| Rap80         | Akbari             | women with familial breast cancer    | Caucasian            | c.-24149G > T | 5' CpG Island   | OR = 2.0 <sup>a</sup> | ND              |
|               |                    |                                      |                      | c.-24001A > G | 5' CpG Island   | OR = 2.0 <sup>a</sup> |                 |
|               |                    |                                      |                      | c.-8A > G     | 5' UTR          | OR = 2.0 <sup>a</sup> |                 |
|               |                    |                                      |                      | c.*27A > C    | 3' UTR          | OR = 2.0 <sup>a</sup> |                 |
|               | Nikkilä            | women with familial breast cancer    | Caucasian            | c.1304C > T   | Exon/missense   | OR = 1.63             | ND              |
|               | Rebeck             | BRCA1 mutation carrier               | Mixed (USA)          | NS            |                 | NS                    | NS              |
|               |                    |                                      | (Caucasian/Hispanic) |               |                 |                       |                 |
|               | Novak              | women with familial breast cancer    | Caucasian            | NS            |                 | NS                    | ND              |
|               | Osorio             | breast/ovarian cancer familial woman | Caucasian            | NS            |                 | NS                    | ND              |
| Present study | Patients with TNBC | Chinese                              | NS                   |               | NS              | NS                    |                 |

|               |                    |                                      |                          |             |                   |                    |           |
|---------------|--------------------|--------------------------------------|--------------------------|-------------|-------------------|--------------------|-----------|
| Abraxas       | Solyom             | breast/ovarian cancer familial woman | Caucasian                | c.1082G > A | Exon/<br>missense | OR = 24.3          | ND        |
|               | Novak              | women with familial breast cancer    | Caucasian                | NS          |                   | NS                 | ND        |
|               | Osorio             | breast/ovarian cancer familial woman | Caucasian                | NS          |                   | NS                 | ND        |
|               | Rebbeck            | BRCA1 mutation carrier               | Mixed (USA)              | NS          |                   | NS                 | NS        |
|               |                    |                                      | (Caucasian/<br>Hispanic) |             |                   |                    |           |
| Present study | Patients with TNBC | Chinese                              | NS                       |             | NS                | NS                 |           |
| BRE           | Rebbeck            | BRCA1 mutation carrier               | Mixed (USA)              | rs11891642  | Intron            | HR = 1.26,<br>1.25 | HR = 1.20 |
|               |                    |                                      | (Caucasian/<br>Hispanic) |             |                   |                    | HR = 1.18 |
|               | Present study      | Patients with TNBC                   | Chinese                  | NS          |                   | NS                 | NS        |

Abbreviations: ND, no data/ not analyzed; NS, no significance

NOTE: <sup>a</sup>The four variants were in complete linkage disequilibrium ( $r^2 = 1.0$ )
